# Supplementary material
Source: PubMed Central journal article supplement (PMC7346583)
Supplement: jci-130-133938-s010.pdf [file jci-130-133938-s010.pdf]

## Supplemental Information

Supplemental Table-I: pH Susceptibility of Common Pathogens.

| Microorganism                     | Inhibitory pH | Optimal Growth pH (range, average) | Reference |
|-----------------------------------|---------------|------------------------------------|-----------|
| <i>Acetobacter baumannii</i>      | 5             | 7                                  | (1)       |
| <i>Bacillus cereus</i>            | 4.3           | 6.75                               | (2)       |
| <i>Bartonella henselae</i>        | <6.6          | 6.8-7.2 (7.0)                      | (3)       |
| <i>Bacteroides fragilis</i>       | 5             | 7-7.5 (7.25)                       | (4)       |
| <i>Bordetella pertusis</i>        | 6             | 7-7.5 (7.25)                       | (5)       |
| <i>Brucella spp.</i>              | 3.5           | 6.6-7.4 (7.0)                      | (6)       |
| <i>E. coli</i>                    | ~4            | 6-8 (7.0)                          | (7)       |
| <i>Campylobacter jejuni</i>       | 4             | 6.5-7.5 (7.0)                      | (8)       |
| <i>Enterococcus spp.</i>          | 4.5           | 7.5                                | (9)       |
| <i>Group A Streptococcus</i>      | 5.5           | 7.5                                | (10, 11)  |
| <i>Group B Streptococcus</i>      | 4.3           | 7                                  | (12)      |
| <i>Histoplasma capsulatum</i>     | 5             | 6-9 (7)                            | (13)      |
| <i>Legionella pneumophila</i>     | 5             | 5.5-9.2 (7.35)                     | (14)      |
| <i>Listeria monocytogenes</i>     | 3.3           | 5.6                                | (15, 16)  |
| <i>Mycobacterium tuberculosis</i> | 6.0           | 7.0                                | (17)      |
| <i>Mycobacterium avium</i>        | 4.6           | 6                                  | (18, 19)  |
| <i>Neisseria gonorrhoea</i>       | 5.8           | 6.7                                | (20, 21)  |
| <i>Neisseria meningitidis</i>     | 6             | 7.2-9.0 (8.1)                      | (22)      |

|                                 |     |              |          |
|---------------------------------|-----|--------------|----------|
| <i>Pseudomonas aeruginosa</i>   | 5.4 | 6-7.5 (6.75) | (23)     |
| <i>Salmonella typhimurium</i>   | 5   | 7            | (24)     |
| <i>Staphylococcus aureus</i>    | 4.3 | 6.5          | (25)     |
| <i>Streptococcus pneumoniae</i> | 7.0 | 7.9          | (26)     |
| <i>Serratia marcescens</i>      | 3.0 | 9.0          | (27, 28) |
| <i>Shigella flexneri</i>        | 5.5 | 7.5          | (29)     |
| <i>Vibrio cholerae</i>          | 5.0 | 8.5          | (30, 31) |
| <i>Yersinia enterocolitica</i>  | 5.0 |              | (32)     |
| <i>Yersinia pestis</i>          | 5   | 7.6          | (33, 34) |

**Supplemental Table-I.** pH Susceptibility of Common Pathogens. pH tolerances of pathogens were found through literature search. In the case of a range of optimal pH, the average was used for simulation data. Species names are italicized.

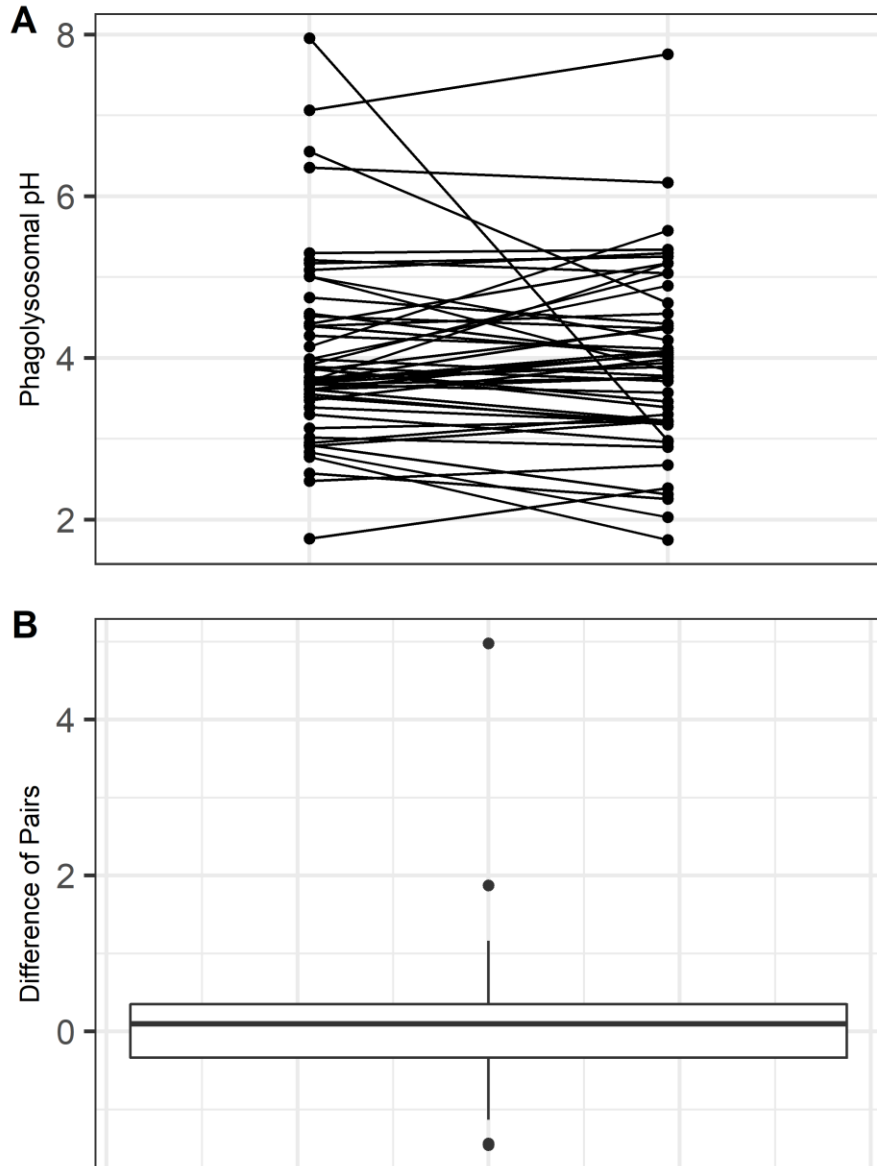

**Supplemental Figure 1.** Analysis of 80 pairs of phagolysosomes within single cells. **A.** Measured phagolysosomal pH of multiple beads located in the same macrophage but non-proximal phagolysosomes. Lines indicate particles within the same macrophage. Phagolysosomes were measured in no particular order. **B.** Differences of each phagolysosomal pH pair approximate a normal distribution centered around 0 with non-zero values despite being generated within the same macrophage at a synchronized starting time.

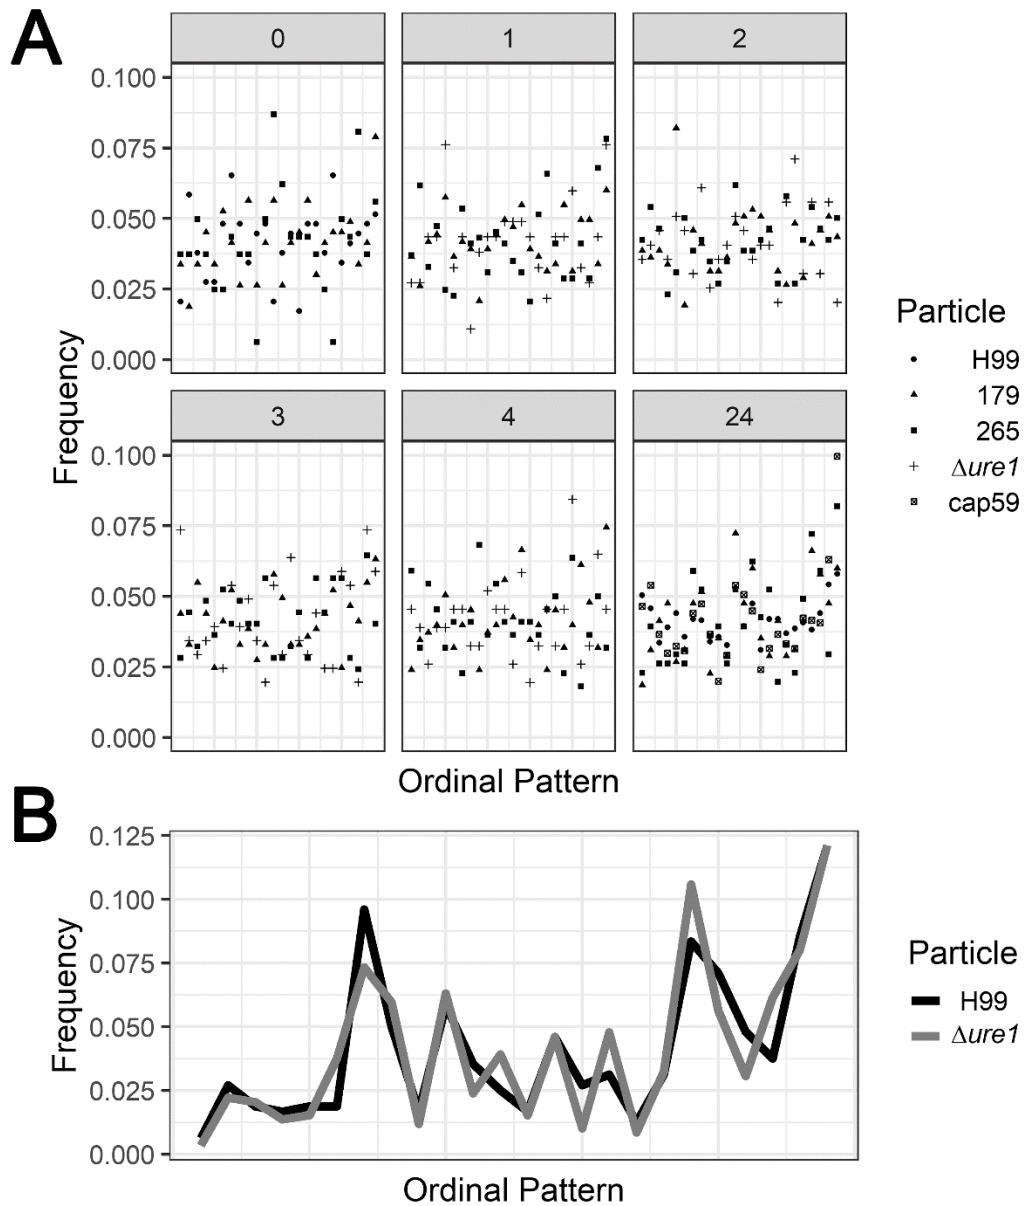

**Supplemental Figure 2.** Ordinal pattern analysis for expanded samples. **A.** Ordinal pattern frequencies for phagolysosomal acidification intervals in BMDMs infected with various particles at various hours post infection (gray box values). **B.** Ordinal pattern frequencies for time elapsed before initiation of budding for yeast strains ingested by BMDMs.

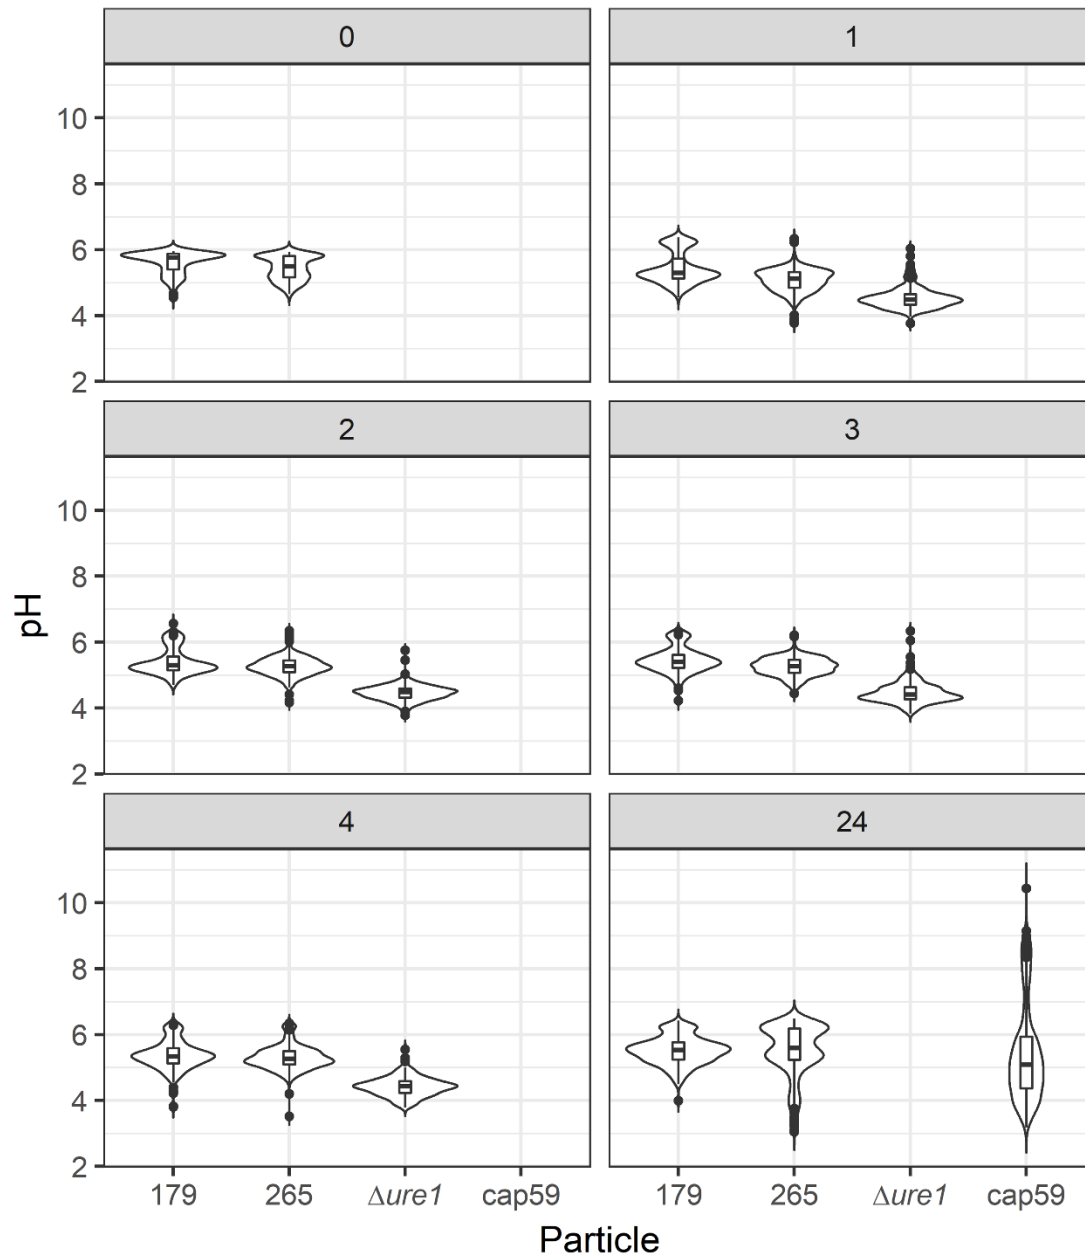

**Supplemental Figure 3.** Phagolysosomal pH distributions for expanded samples. Two strains of *C. gattii* (179 and 265), a urease deficient H99 mutant ( $\Delta ure1$ ), and a capsule deficient H99 mutant (cap59) were analyzed at various hours post infection (gray box value).

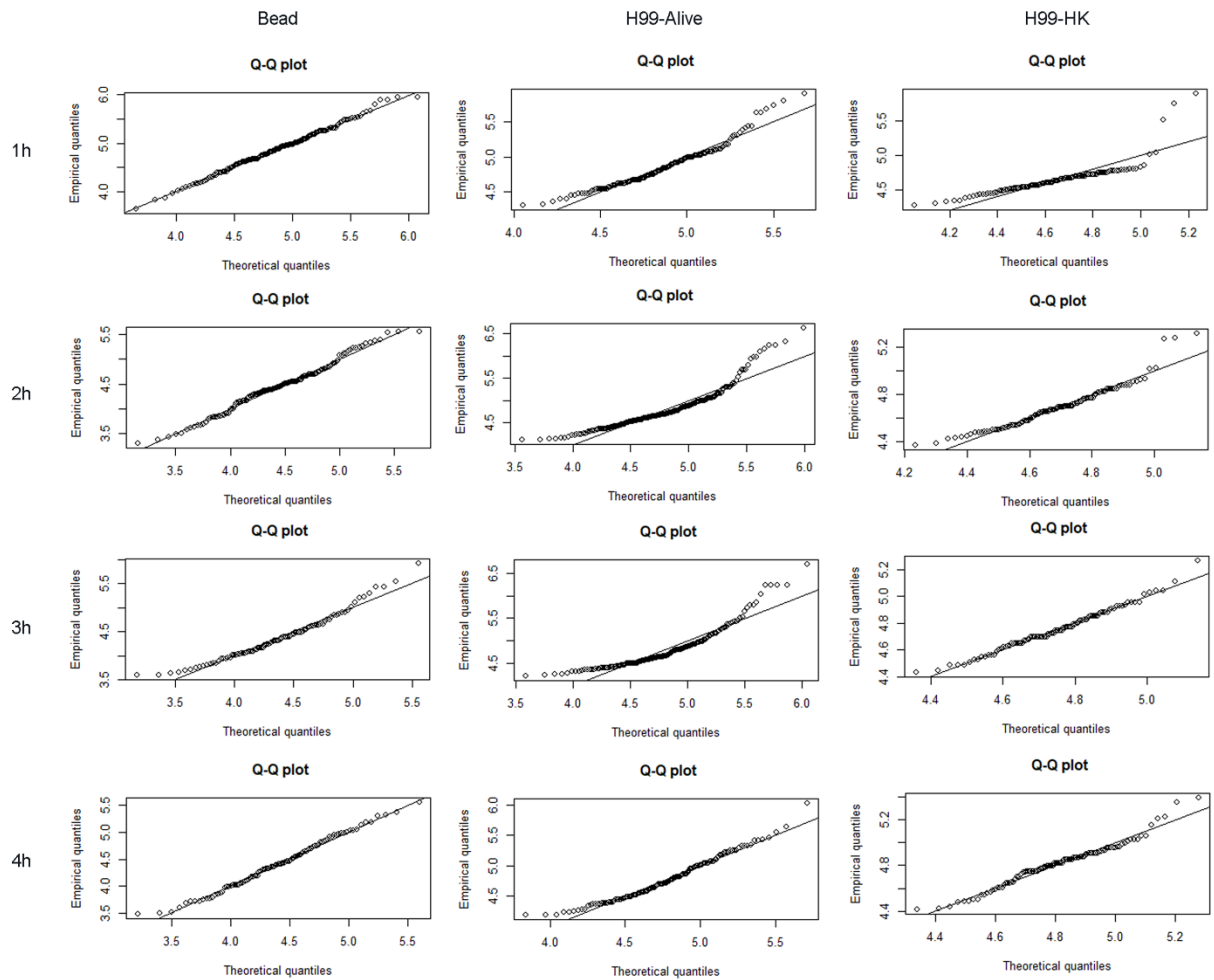

**Supplemental Figure 4.** Q-Q plots of macrophages 1-4 HPI after ingesting various particles. Note that bead containing phagolysosomes closely approximate a normal distribution, while *C. neoformans* containing phagolysosomes have heavy tails, regardless if the particle is live or dead.

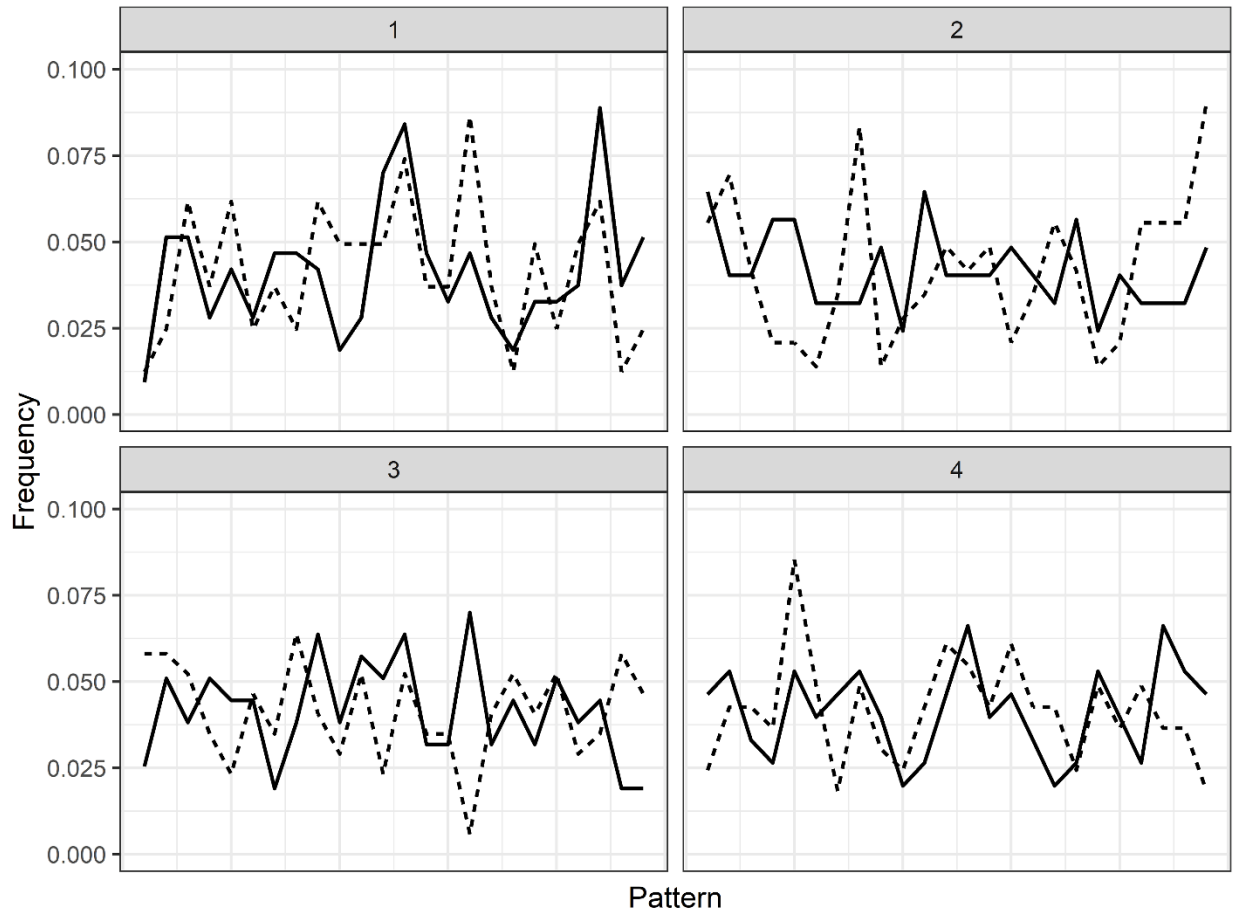

**Supplemental Figure 5.** Ordinal pattern analysis for EEA1 (solid) and VATPase (dashed) immunofluorescent staining for bead containing macrophage phagolysosomes at various hours post ingestion (gray box values). No forbidden ordinal patterns were detected for any samples, suggesting phagolysosomal maturation marker acquisition is a stochastic process.

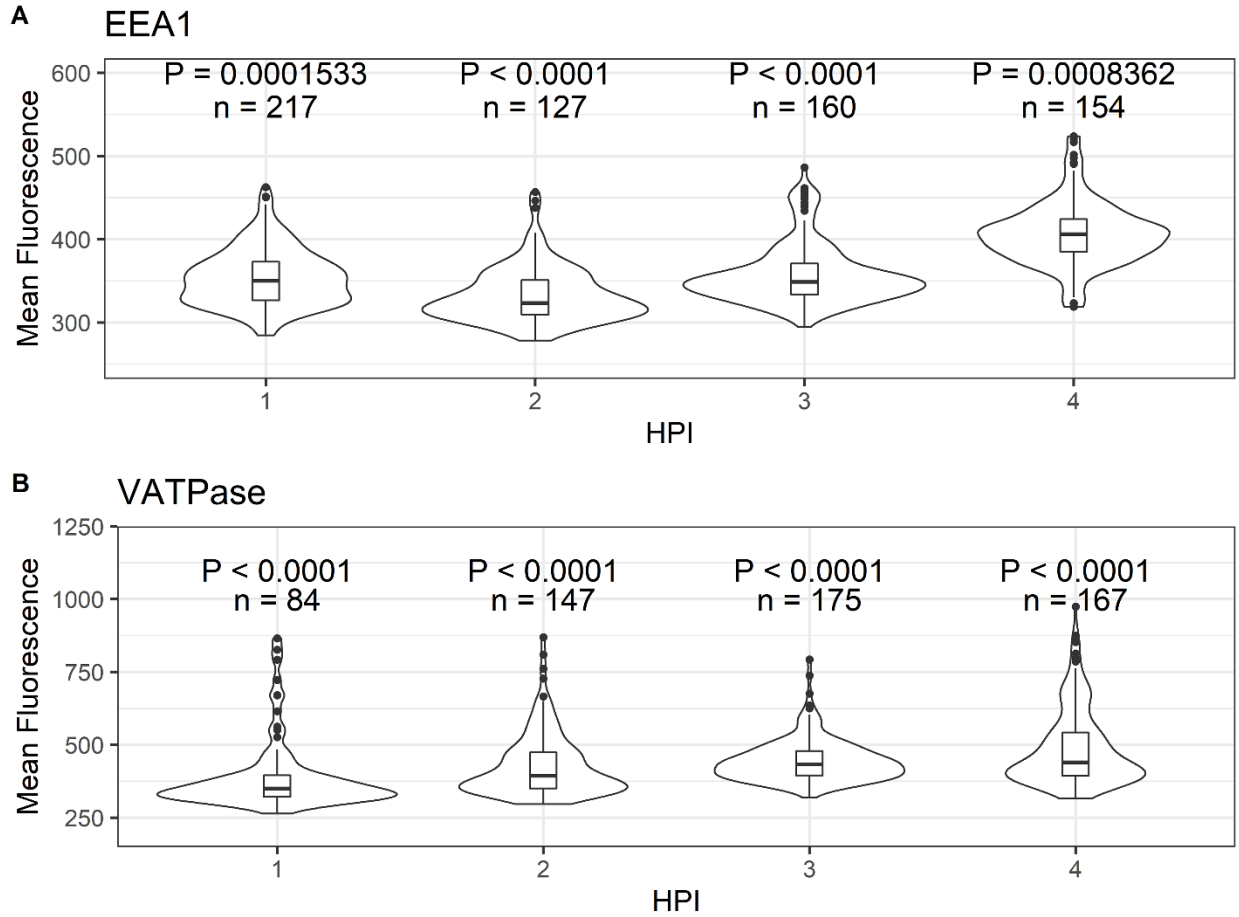

**Supplemental Figure 6.** Mean fluorescence intensity values for EEA1 and VATPase immunofluorescent staining. The acquisition of these phagolysosomal maturation markers does not resemble that of bead containing phagolysosomal pH, as no samples here are normally distributed. P values were determined via Shapiro-Wilk normality test.



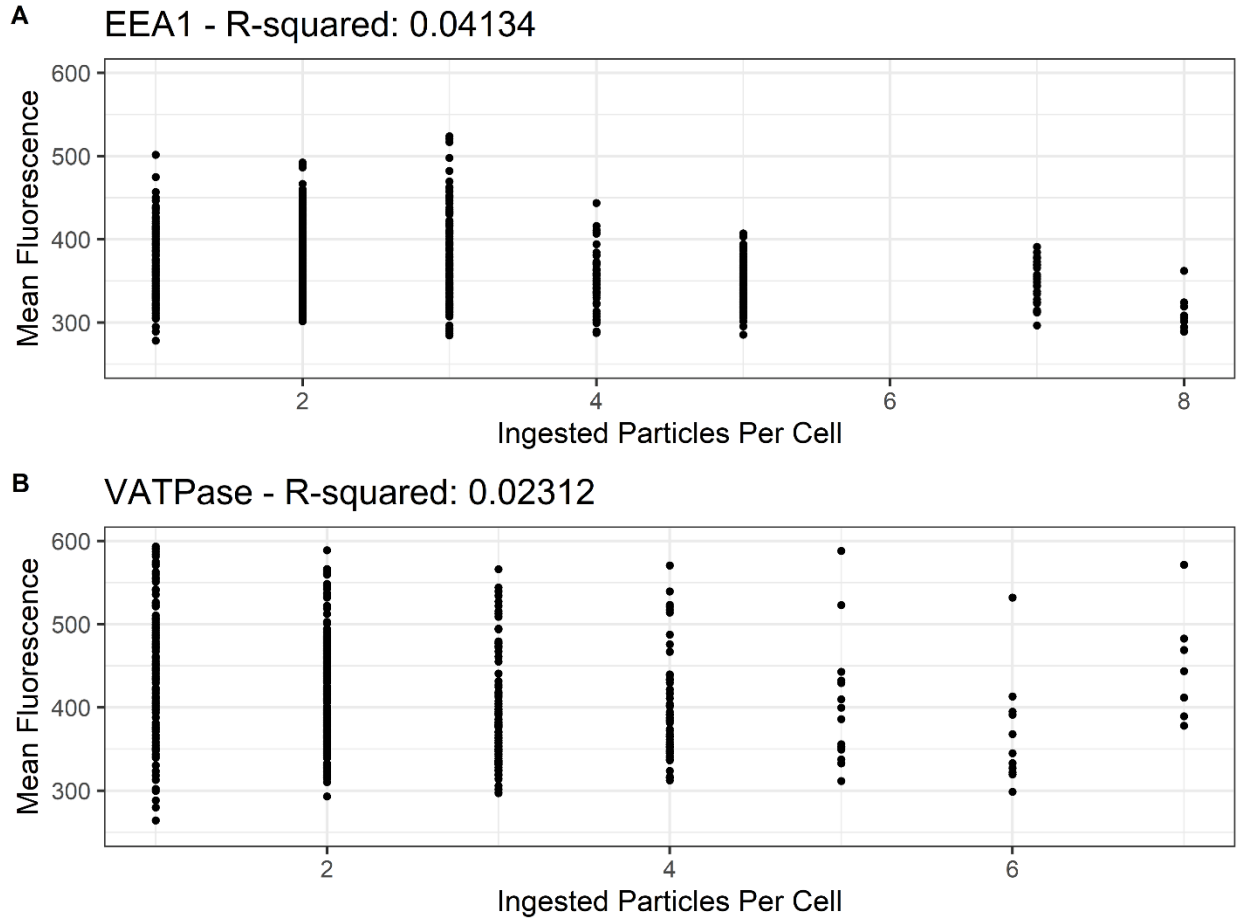

**Supplemental Figure 7.** Mean fluorescent intensity of macrophage ingested beads stained for EEA1 and VATPase, sorted according to total ingested particles per cell. Linear regressions were calculated for each sample set but clearly there is no significant correlation between total ingested particles and number of EEA1 or VATPase molecules as measured by fluorescent intensity.

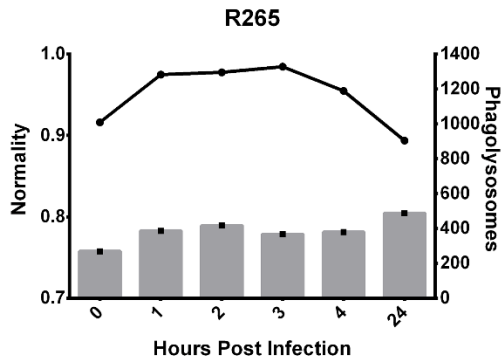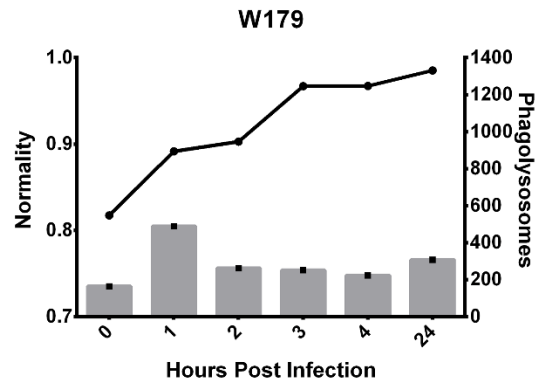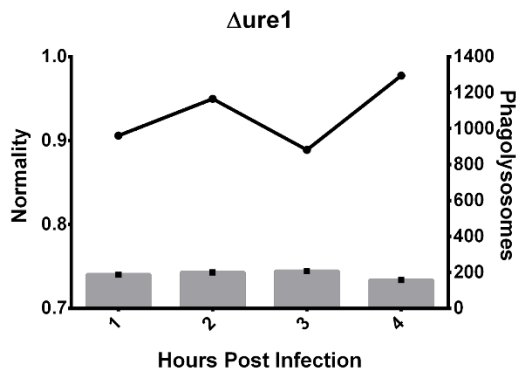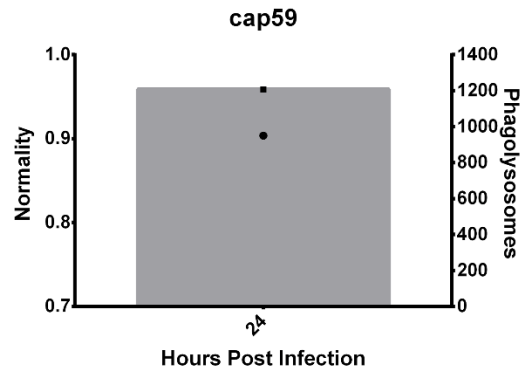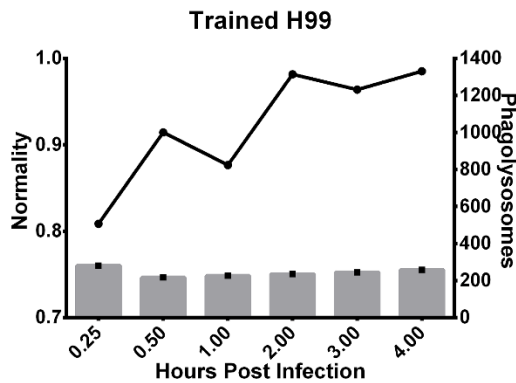

**Supplemental Figure 8.** Normality analysis for expanded samples. Shapiro-Wilk normality values (lines) alongside total phagolysosome sample sizes (bars) for two strains of *C. gattii* (179 and 265), a urease deficient H99 mutant ( $\Delta ure1$ ), a capsule deficient H99 mutant (*cap59*), and trained BMDMs on reinfection.

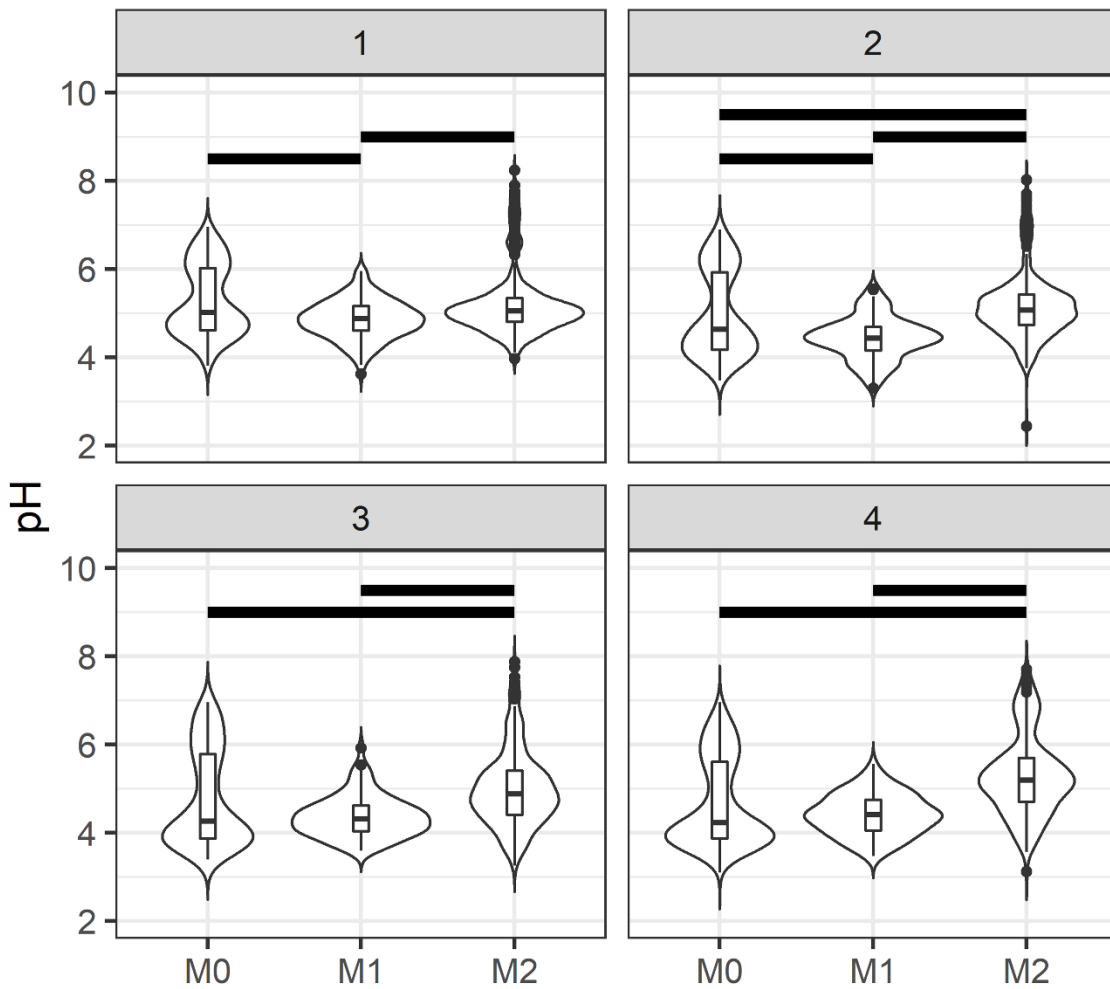

**Supplemental Figure 9.** Phagolysosomal pH distributions for bead containing phagolysosomes of differently polarized BMDMs at each measured time post infection (gray box values). Black bars represent  $P < 0.0001$  via Kruskal-Wallis test with Wilcox rank pairing test.

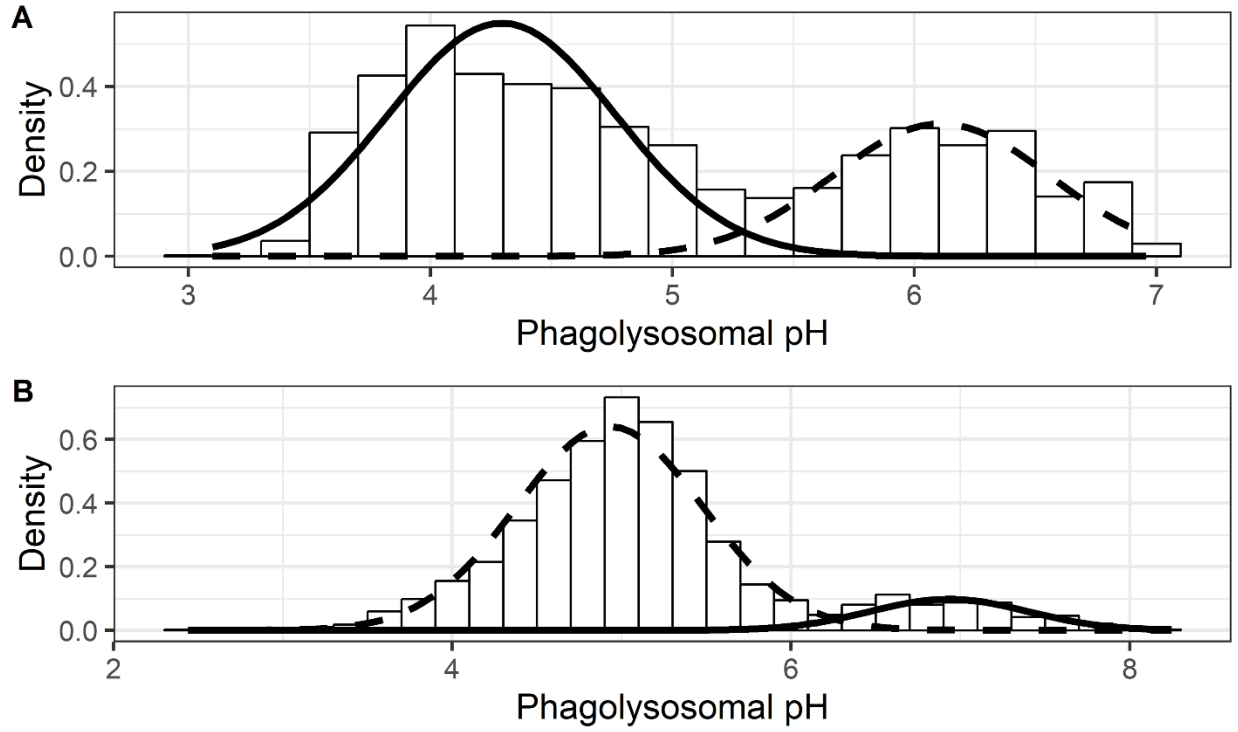

**Supplemental Figure 10.** Bimodal models fitted to the observed data for **A.** M0 and **B.** M2 skewed macrophages. Models are attempted fits of two mixed Gaussian distributions. Histogram bars visualize the observed data while solid and dashed lines depict the relative contributions of the two hypothetical Gaussian distributions.

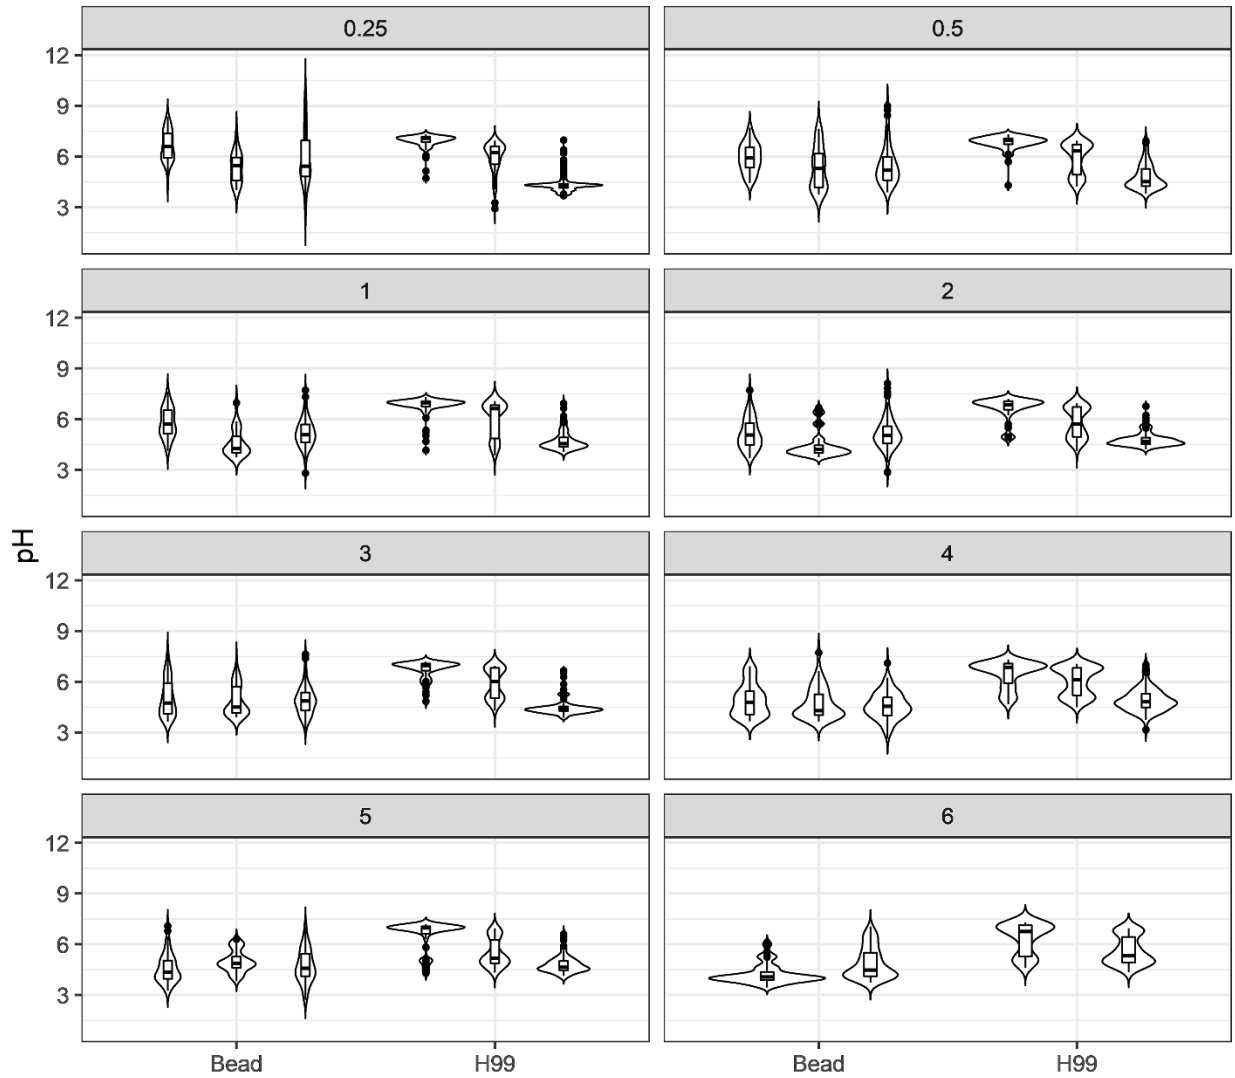

**Supplemental Figure 11.** Phagolysosomal pH distributions for human macrophages infected with H99 separated by individual donor. Human macrophages were analyzed after ingesting either H99 or inert beads at various hours post infection (gray box value).

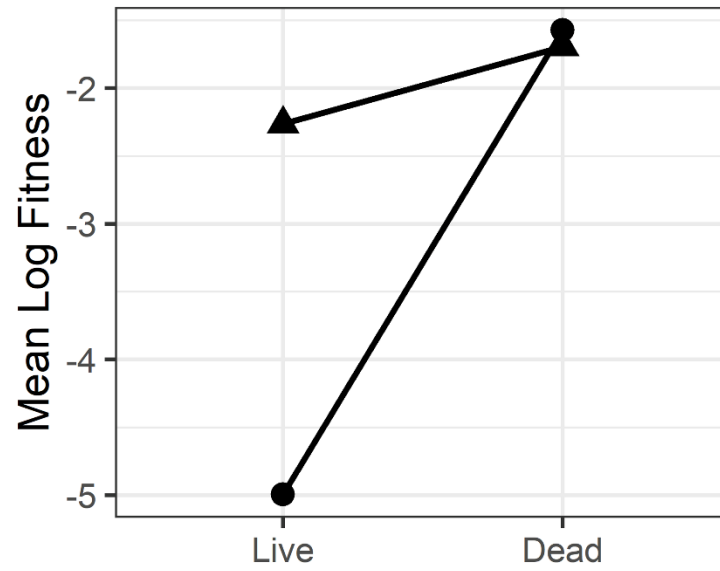

**Supplemental Figure 12.** Estimated mean log fitness of macrophages containing live or killed *M. avium*. Phagolysosomal pH data was gathered from literature using either video microscopy (triangles) or confocal microscopy (circles).

## References

1. Zhan H et al. Kinetics and Novel Degradation Pathway of Permethrin in *Acinetobacter baumannii* ZH-14. *Front Microbiol* 2018;9:98.
2. Raevuori M, Genigeorgis C. Effect of pH and sodium chloride on growth of *Bacillus cereus* in laboratory media and certain foods. *Appl Microbiol* 1975;29(1):68–73.
3. Chenoweth MR, Somerville GA, Krause DC, O'Reilly KL, Gherardini FC. Growth characteristics of *Bartonella henselae* in a novel liquid medium: primary isolation, growth-phase-dependent phage induction, and metabolic studies. *Appl Env. Microbiol* 2004;70(2):656–663.
4. Tamimi HA, Hiltbrand W, Loercher H. Some growth requirements of *Bacteroides fragilis*. *J Bacteriol* 1960;80:472–476.
5. Venkatesh G.;Debral,A.K.;Kirpan,P.;Reers,M.;Murthy,P.V.V.S.;Swarupa,V.;Srikanth,L.;Sarma,P.V.G.K. K ;Reine. pH Optimization and Production of High Potent Cellular Vaccine by *Bordetella pertussis*. *Int. J. Biotechnol. Bioeng. Res.* 2012;3:17–25.
6. Brenner N.R.;Staley,J.T. DJ ;Krie. (ed). *Bergey's Manual of Bacteriology. The Proteobacteria*. New York: Springer;
7. Jordan S.E. RC ;Jacob. The Effect of pH at Different Temperatures on the Growth of *Bacterium coli* with a Constant Food Supply. *J.Gen.Microbiol.* 1948;2:15–24.
8. Silva J et al. *Campylobacter* spp. as a Foodborne Pathogen: A Review. *Front Microbiol* 2011;2:200.
9. Fisher K, Phillips C. The ecology, epidemiology and virulence of *Enterococcus*. *Microbiology* 2009;155(Pt 6):1749–1757.
10. Gera K, McIver KS. Laboratory growth and maintenance of *Streptococcus pyogenes* (the Group A *Streptococcus*, GAS). *Curr Protoc Microbiol* 2013;30:Unit 9D.2.
11. Savic DJ, McShan WM. Long-term survival of *Streptococcus pyogenes* in rich media is pH-dependent. *Microbiology* 2012;158(Pt 6):1428–1436.
12. Yang Q et al. The impact of pH and nutrient stress on the growth and survival of *Streptococcus agalactiae*. *Antonie Van Leeuwenhoek* 2012;102(2):277–287.
13. Goodman NL, Larsh HW. Environmental factors and growth of *Histoplasma capsulatum* in soil. *Mycopathol Mycol Appl* 1967;33(2):145–156.
14. Wadowsky RM, Wolford R, McNamara AM, Yee RB. Effect of temperature, pH, and oxygen level on the multiplication of naturally occurring *Legionella pneumophila* in potable water. *Appl Env. Microbiol* 1985;49(5):1197–1205.
15. Tienungoon S, Ratkowsky DA, McMeekin TA, Ross T. Growth limits of *Listeria monocytogenes* as a function of temperature, pH, NaCl, and lactic acid. *Appl Env. Microbiol* 2000;66(11):4979–4987.
16. Conner DE, Brackett RE, Beuchat LR. Effect of temperature, sodium chloride, and pH on growth of *Listeria monocytogenes* in cabbage juice. *Appl Env. Microbiol* 1986;52(1):59–63.
17. Piddington DL, Kashkouli A, Buchmeier NA. Growth of *Mycobacterium tuberculosis* in a defined medium is very restricted by acid pH and Mg(2+) levels. *Infect Immun* 2000;68(8):4518–4522.

18. Oh YK, Straubinger RM. Intracellular fate of Mycobacterium avium: use of dual-label spectrofluorometry to investigate the influence of bacterial viability and opsonization on phagosomal pH and phagosome-lysosome interaction. *Infect Immun* 1996;64(1):319–325.
19. Portaels F, Pattyn SR. Growth of mycobacteria in relation to the pH of the medium. *Ann Microbiol* 1982;133(2):213–221.
20. Pettit RK, McAllister SC, Hamer TA. Response of gonococcal clinical isolates to acidic conditions. *J Med Microbiol* 1999;48(2):149–156.
21. Brookes R, Sikyta B. Influence of pH on the growth characteristics of Neisseria gonorrhoeae in continuous culture. *Appl Microbiol* 1967;15(2):224–227.
22. Kohman EF. The So-called Reduced Oxygen Tension for Growing the Meningococcus. *J Bacteriol* 1919;4(6):571–584.
23. Tsuji A, Kaneko Y, Takahashi K, Ogawa M, Goto S. The effects of temperature and pH on the growth of eight enteric and nine glucose non-fermenting species of gram-negative rods. *Microbiol Immunol* 1982;26(1):15–24.
24. Stokes JL, Bayne HG. Growth rates of Salmonella colonies. *J Bacteriol* 1957;74(2):200–206.
25. Valero A et al. Modelling the growth boundaries of Staphylococcus aureus: Effect of temperature, pH and water activity. *Int J Food Microbiol* 2009;133(1–2):186–194.
26. Dernby KG, Avery OT. THE OPTIMUM HYDROGEN ION CONCENTRATION FOR THE GROWTH OF PNEUMOCOCCUS. *J Exp Med* 1918;28(3):345–357.
27. Williams RP, Gott CL, Qadri SM, Scott RH. Influence of temperature of incubation and type of growth medium on pigmentation in Serratia marcescens. *J Bacteriol* 1971;106(2):438–443.
28. Giri A V, Anandkumar N, Muthukumar G, Pennathur G. A novel medium for the enhanced cell growth and production of prodigiosin from Serratia marcescens isolated from soil. *BMC Microbiol* 2004;4:11.
29. Erlandson Jr. AL, Mackey WH. Nutrition of Shigella: growth of Shigella flexneri in a simple chemically defined medium. *J Bacteriol* 1958;75(3):253–257.
30. Patel M.;Gouws,E. M ;Isaacso. Effect of Iron and pH on the survival of Vibrio cholerae in water. *Trans. R. Soc. Trop. Med. Hygiene* 1995;89:175–177.
31. Huq A, West PA, Small EB, Huq MI, Colwell RR. Influence of water temperature, salinity, and pH on survival and growth of toxigenic Vibrio cholerae serovar O1 associated with live copepods in laboratory microcosms. *Appl Env. Microbiol* 1984;48(2):420–424.
32. Adams MR, Little CL, Easter MC. Modelling the effect of pH, acidulant and temperature on the growth rate of Yersinia enterocolitica. *J Appl Bacteriol* 1991;71(1):65–71.
33. Brubaker RR. Influence of Na(+), dicarboxylic amino acids, and pH in modulating the low-calcium response of Yersinia pestis. *Infect Immun* 2005;73(8):4743–4752.
34. Perry RD, Fetherston JD. Yersinia pestis--etiologic agent of plague [Internet]. *Clin. Microbiol. Rev* 1997;10(1):35–66.
